# Supplementary material for: A phenotypic screen of Marfan syndrome iPSC-derived vascular smooth muscle cells uncovers GSK3β as a new target
Source: PubMed Central journal article supplement (PMC9968988; doi:10.1016/j.stemcr.2022.12.014), 2023-01-19
Supplement: mmc1.pdf [file mmc1.pdf]

**Stem Cell Reports, Volume 18**

**Supplemental Information**

**A phenotypic screen of Marfan syndrome iPSC-derived vascular smooth muscle cells uncovers GSK3 $\beta$  as a new target**

**Hongorzul Davaapil, Madeline McNamara, Alessandra Granata, Robyn G.C. Macrae, Mei Hirano, Martina Fitzek, J.A. Aragon-Martin, Anne Child, David M. Smith, and Sanjay Sinha**

# Supplemental Figure 1

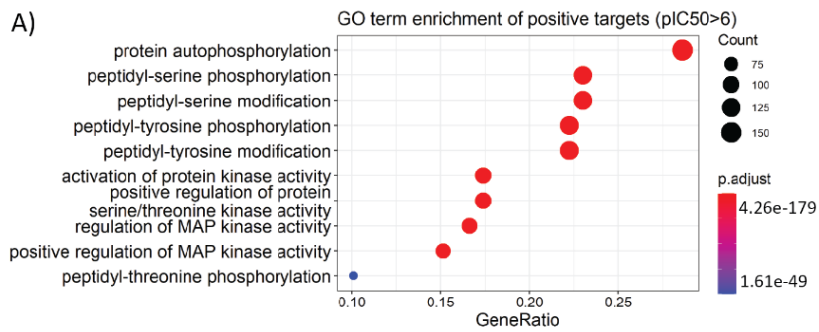

**C)**

| ID       | Description                       | pvalue   | p.adjust | qvalue   | Count |
|----------|-----------------------------------|----------|----------|----------|-------|
| hsa04010 | MAPK signaling pathway            | 3.50E-39 | 8.72E-37 | 2.95E-37 | 82    |
| hsa04068 | FoxO signaling pathway            | 5.03E-30 | 6.26E-28 | 2.12E-28 | 49    |
| hsa04012 | ErbB signaling pathway            | 2.47E-29 | 2.05E-27 | 6.93E-28 | 40    |
| hsa04722 | Neurotrophin signaling pathway    | 5.77E-29 | 3.59E-27 | 1.21E-27 | 46    |
| hsa05135 | Yersinia infection                | 6.85E-23 | 3.41E-21 | 1.15E-21 | 43    |
| hsa05161 | Hepatitis B                       | 2.21E-22 | 9.17E-21 | 3.10E-21 | 46    |
| hsa04660 | T cell receptor signaling pathway | 5.65E-22 | 2.01E-20 | 6.79E-21 | 37    |
| hsa04360 | Axon guidance                     | 6.14E-21 | 1.91E-19 | 6.46E-20 | 47    |
| hsa04510 | Focal adhesion                    | 1.28E-20 | 3.53E-19 | 1.19E-19 | 49    |
| hsa05170 | HIV1 infection                    | 2.38E-20 | 5.93E-19 | 2.01E-19 | 50    |

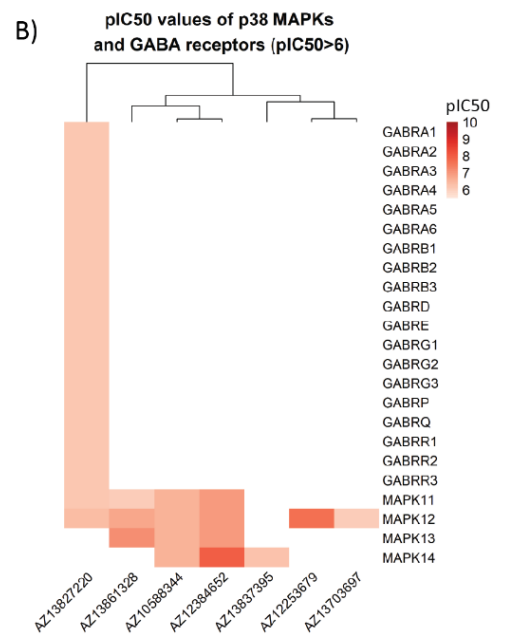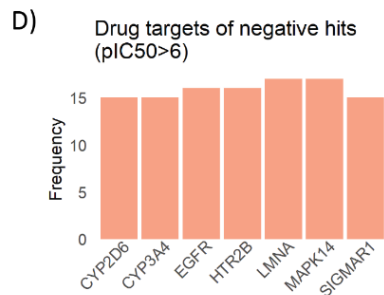

## Supplemental Figure 2

A) Correlation of both positive and negative drug targets (pIC50>6)

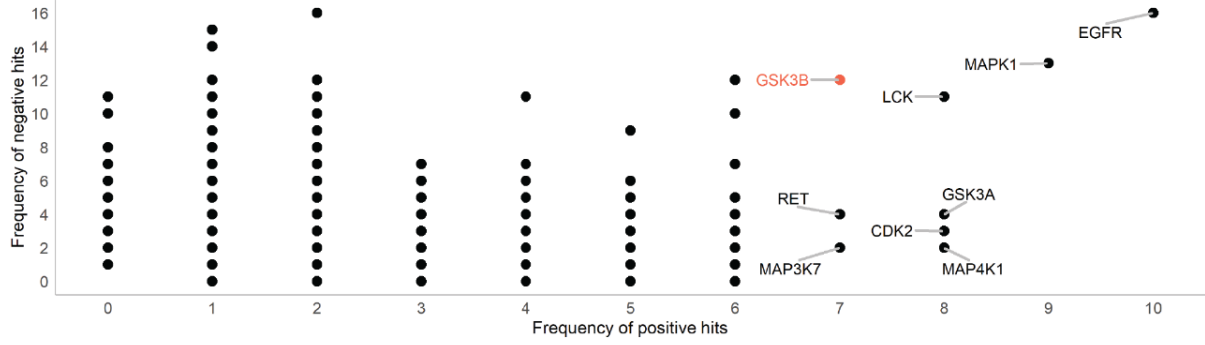

B) Correlation of both positive and negative drug targets (pIC50>7)

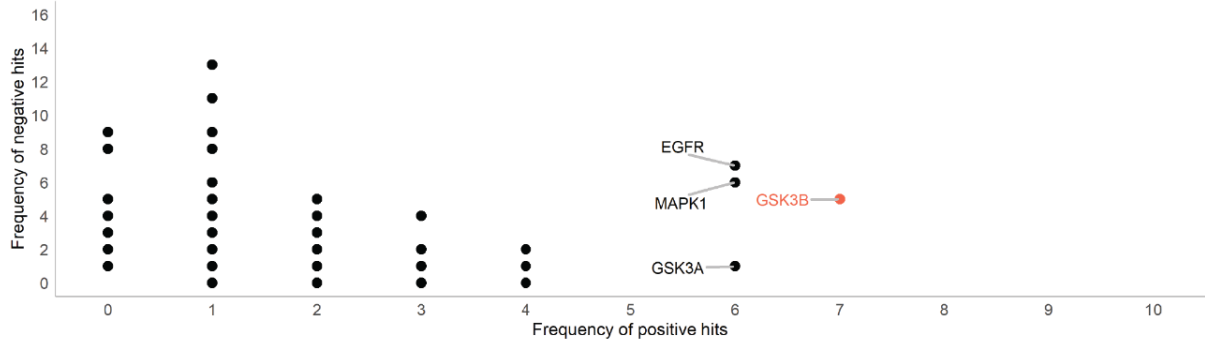

C) Correlation of both positive and negative drug targets (pIC50>8)

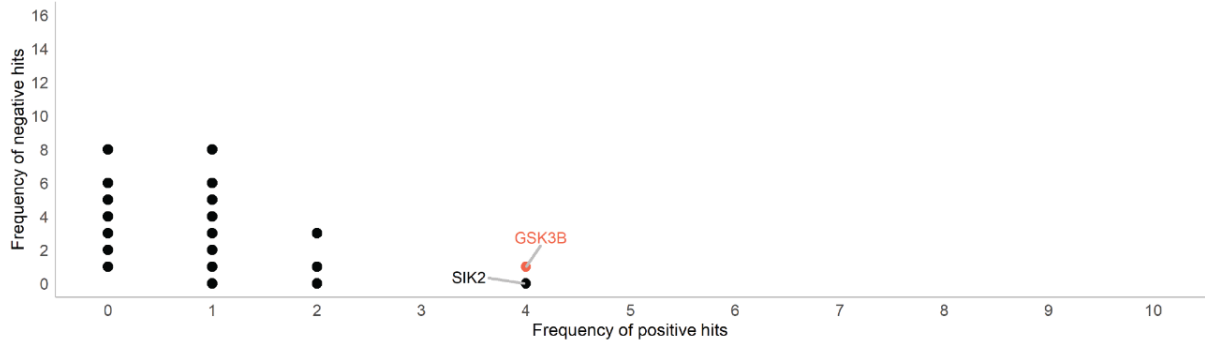

Supplemental Figure 3

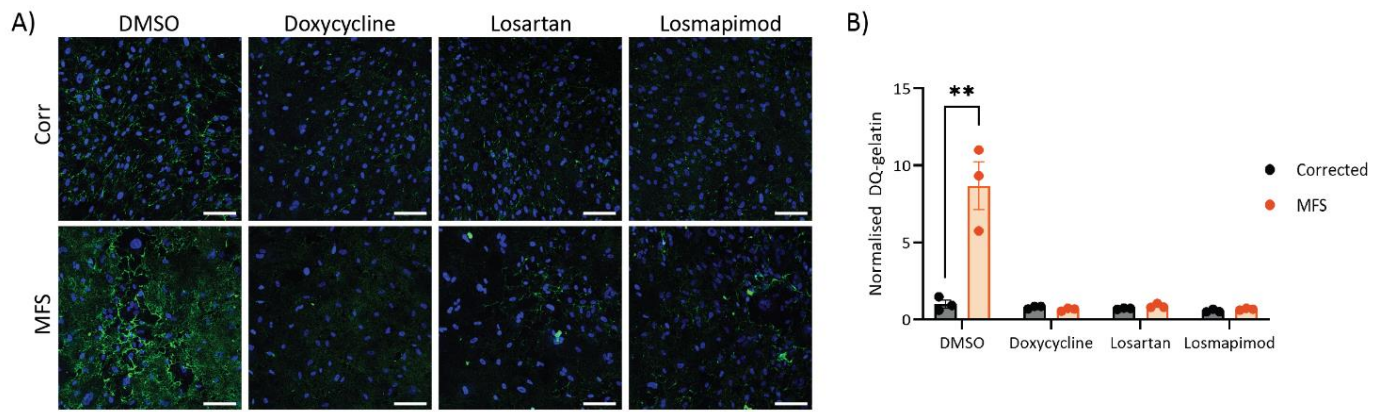

Supplemental Figure 4

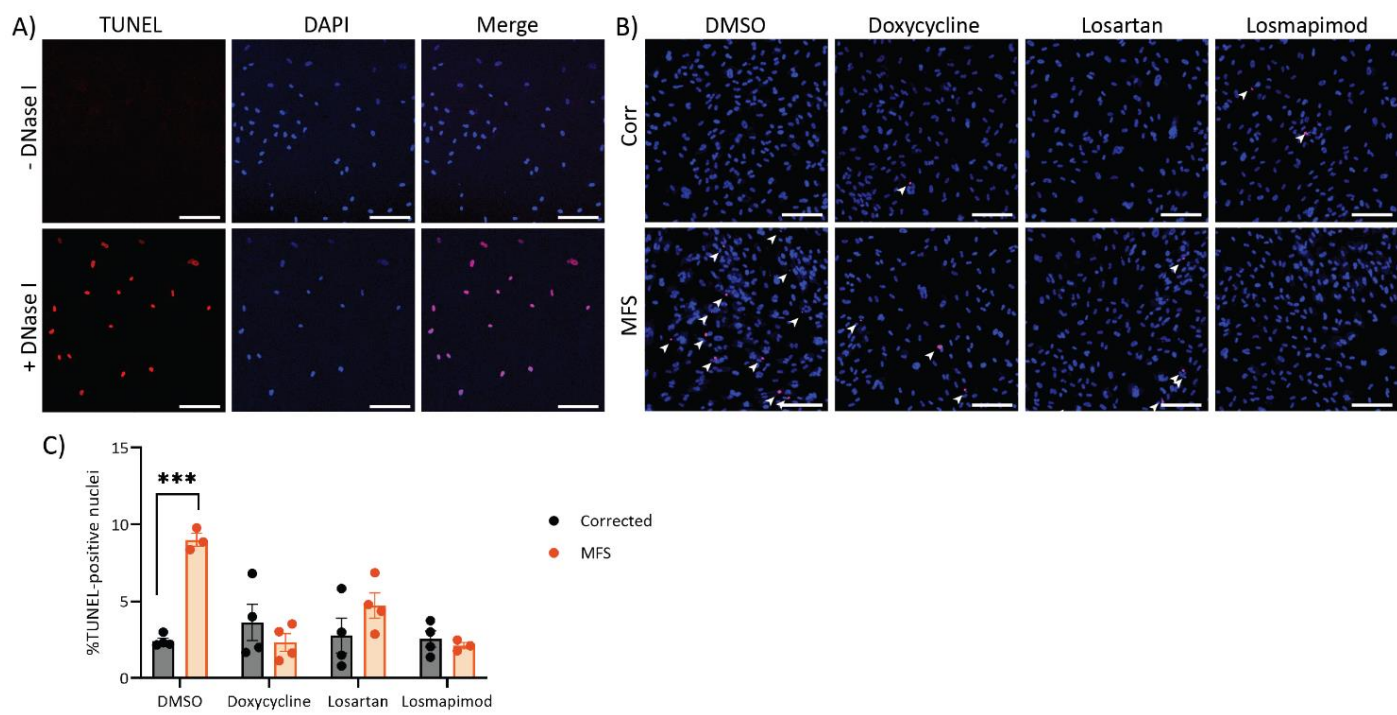

Supplemental Figure 5

**pIC50 values of GSK3b inhibitors  
(pIC50>6)**

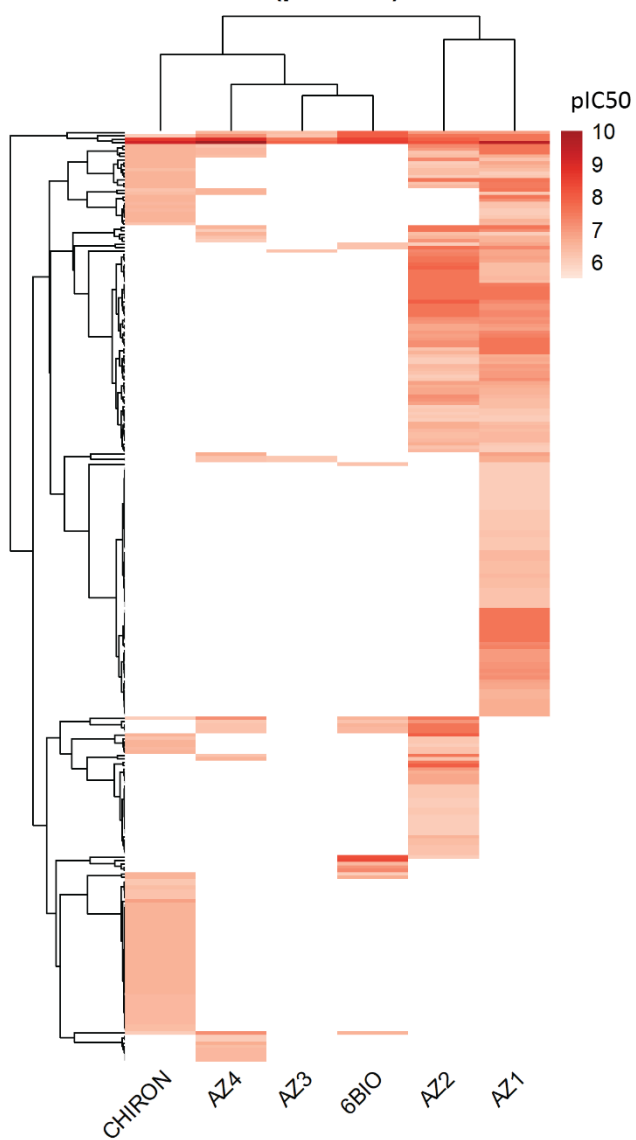

Supplemental Figure 6

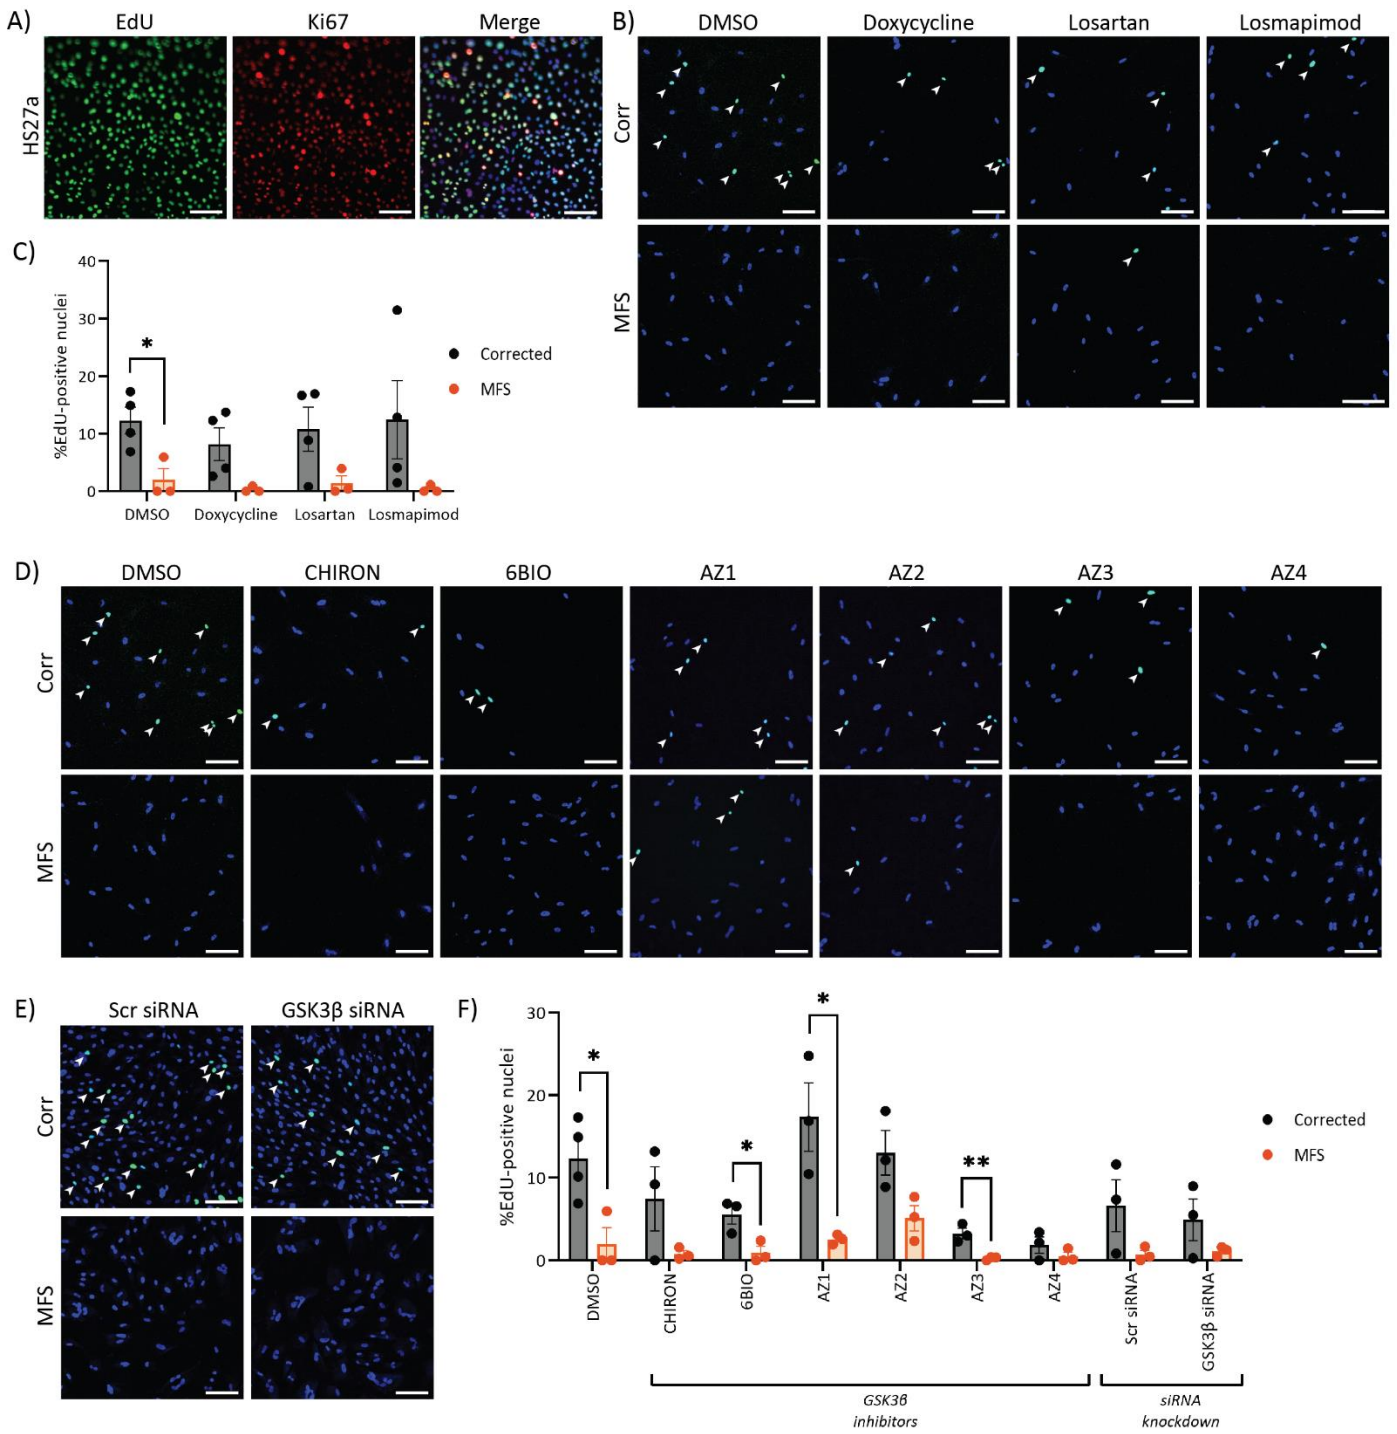

Supplemental Figure 7

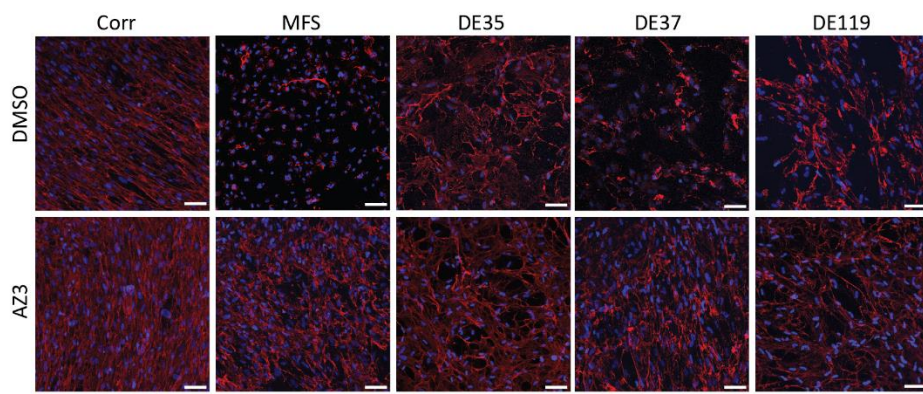



## Supplemental Figure legends

**Supplemental Figure 1. Computational analysis of positive hits from drug screen.** **A)** GO term enrichment of drug targets indicates that the majority of hits are for kinases. **B)** Previously identified p38 MAPK and GABA receptors were also found to be positive hits from the drug screen. Heatmap illustrates pIC50 values for these interactions. **C)** KEGG Pathway enrichment analysis. **D)** Top recurring targets of the negative hits from the screen does not include GSK3 $\beta$ .

**Supplemental Figure 2. Correlation between the number of positive and negative hits filtered by pIC50>6 (A), pIC50>7 (B) and pIC50>8 (C).**

**Supplemental Figure 3. In-situ zymography with non-GSK3 $\beta$  inhibitors.** DQ-gelatin staining (**A**) and quantification (**B**). 150 $\mu$ m scale bars throughout. n=3. Cells treated under control conditions (DMSO) were also used as controls for Figure 4.

**Supplemental Figure 4. TUNEL staining to determine apoptosis.** **A)** Corrected VSMCs treated with DNase I show TUNEL staining. **B)** Treatment with non-GSK3 $\beta$  inhibitors and quantification of TUNEL% nuclei (**C**). 150 $\mu$ m scale bars throughout. n=3-4. Cells treated under control condition (DMSO) was also used as controls for Figure 5.

**Supplemental Figure 5. Off-targets of GSK3 $\beta$  SMI and their pIC50 values.** pIC50 values are represented in a heatmap.

**Supplemental Figure 6. Proliferation was assessed by incorporation of EdU.** **A)** Highly-proliferative HS27a cells were used as a positive control was used to verify staining conditions. Incorporated EdU was stained in green, Ki67 in red and DAPI in blue. **B)** Effect of non-GSK3 $\beta$  inhibitors on proliferation and **C)** quantification. **D)** Effect of GSK3 $\beta$  inhibitors and siRNA on proliferation and **F)** quantification. n=3-4. 150 $\mu$ m scale bars throughout. Cells treated under control condition (DMSO) were used as controls for panels B and D and their quantifications.

**Supplemental Figure 7.** Fibrillin-1 deposition is partially restored after treatment for 4 days with GSK3 $\beta$  inhibitors. 150 $\mu$ m scale bars throughout.

Supplemental Tables

**Supplemental Table 1.** pIC50 values of drug targets from positive hits from the drug screen.

**Supplemental Table 2.** Frequency of drug targets amongst effective SMs from drug screen.

**Supplemental Table 3.** pIC50 values of drug targets of GSK3 $\beta$ -targeting SMIs used for validation.

| Cell line | <i>FBN1</i> mutation                                                                                          |
|-----------|---------------------------------------------------------------------------------------------------------------|
| DE35      | c.1837+5G>C                                                                                                   |
| DE37      | Unknown – diagnosis was based on clinical criteria.<br>Reduced fibrillin-1 deposition in patient fibroblasts. |
| DE119     | c.1051C>T; p.(Q351*)                                                                                          |

**Supplemental Table 4.** Additional MFS patient lines used. Where *FBN1* mutations were unavailable, diagnosis was based on clinical criteria for MFS.

| Antibody target                        | Catalogue number | Supplier                   | Concentration |
|----------------------------------------|------------------|----------------------------|---------------|
| Calponin-1                             | C2687            | Sigma                      | 1:300         |
| K167                                   | 9129             | Cell Signalling Technology | 1:300         |
| Fibrillin-1                            | MAB1919          | Millipore                  | 1:100         |
| Goat anti-mouse IgG (Alexa Fluor 594)  | A32742           | Invitrogen                 | 1:1,000       |
| Goat anti-rabbit IgG (Alexa Fluor 594) | A32740           | Invitrogen                 | 1:1,000       |

**Supplemental Table 5.** Antibodies used for ICC.

| Antibody target     | Catalogue number | Supplier                   | Concentration |
|---------------------|------------------|----------------------------|---------------|
| GSK3 $\beta$        | 9832             | Cell Signalling Technology | 1:1,000       |
| GSK3 $\beta$ (Ser9) | 9336             | Cell Signalling Technology | 1:1,000       |
| GSK3 $\alpha$       | 9338             | Cell Signalling Technology | 1:1,000       |
| $\beta$ -catenin    | 9562             | Cell Signalling Technology | 1:1,000       |
| GAPDH               | G9545            | Sigma-Aldrich              | 1:10,000      |
| Mouse secondary     | NA931            | GE-Healthcare              | 1:5,000       |
| Rabbit secondary    | 7074             | Cell Signalling Technology | 1:2,000       |

**Supplemental Table 6.** Antibodies used for western blotting.

## Supplemental experimental procedures

### Luciferase assay

Cells were seeded onto 12-well plates and transfected with 1 $\mu$ g of M50 Super 8x TOPFlash reporter (Addgene 12456) and 20ng CMV-Renilla Luciferase (Promega) using Lipofectamine 2000 (Invitrogen). The next day, cells were treated with drugs for 4 hours before being harvested and processed using the Dual-Luciferase Reporter Assay Kit (Promega) as per the manufacturer's instructions. After transferring samples to an opaque white 96-well plate, both Firefly and Renilla luminescence signals were measured using a SpectraMax M2e plate reader. M50 Super 8x TOPFlash was a gift from Randall Moon (Addgene plasmid #12456; <http://n2t.net/addgene:12456> ; RRID:Addgene\_12456).

### Immunocytochemistry (ICC)

Cells were washed with PBS and fixed with 4% PFA for 15 minutes. After subsequent washes with PBS, cells were permeabilised with 0.05% triton X-100 before blocking with 10% FBS in PBS. The primary antibody (Supp Table 2) was incubated overnight at 4°C. The next day, samples were washed in PBS and incubated with the secondary antibody (Supp Table 5) for 1 hour at room temperature. Finally, after another wash in PBS, nuclear staining was performed using Hoechst 33342 (Invitrogen) for 10 minutes.

### EdU proliferation assay

VSMCs were seeded onto 0.1% gelatin-coated plates and began their 96-hour treatment with either SMIs or transfection with siRNA. They were then incubated with 20 $\mu$ M EdU for 16 hours. EdU staining was performed using the Click-iT™ Plus EdU Cell Proliferation Kit (Invitrogen) as per the manufacturer's instructions. Images were taken using an automated Leica Matrix DMI 6000 microscope. Images were processed and quantified in ImageJ. The number of nuclei stained either for EdU or Hoescht was quantified after initial image processing. All steps were performed using a macro.

### Protein extraction and western blotting

Protein was extracted from adherent cells with RIPA buffer (Sigma-Aldrich) supplemented with HALT Protease and Phosphatase Inhibitor (Pierce). After quantification using the BCA Assay (Pierce), lysates were then mixed with 4x Sample Buffer (Bio-Rad) containing  $\beta$ -mercaptoethanol before being denatured at 98°C for 5 minutes. Lysates were subsequently centrifuged at 16,000 x g for 5 minutes, and supernatant corresponding to 4 $\mu$ g protein was then loaded into 4–15% Mini-PROTEAN® TGX™ Precast Protein Gels (Bio-Rad). SDS-PAGE was run for approximately 90 minutes at 80V. Proteins were transferred on a methanol-activated PVDF membrane (Merck) using the wet transfer method running at 60V for 2 hours. Membranes were rinsed with Tris-buffered saline plus 0.1% Tween 20 (TBST) before blocking in 5% BSA for 1 hour before primary antibody incubation was performed overnight at 4°C (Supp Table 6). The following day, membranes were washed 3 times with TBST for 10 minutes each and incubated with HRP-conjugated secondary antibodies (Supp Table 6) for 1 hour at room temperature. Membranes were washed another 3 times with TBST for 10 minutes each before incubating with ECL reagent (Pierce). Films were exposed to membranes before being developed using the Konica Minolta SRX-101A.
